# Supplementary material
Source: HighWire-hosted journal article supplement (https://cmaj.ca/highwire/filestream/149168/field_highwire_adjunct_files/0/221018-res-1-at.pdf)
Supplement: 221018-res-1-at.pdf [file 221018-res-1-at.pdf]

# Prevalence and predictors of primary non-adherence to medications prescribed in primary care

## List of figures and tables

**Figure S1.** Scheme illustrating the definition and characterization of primary non-adherence (PNA) in our study

**Table S1.** Two-by-two tables of PNA rates across patient-provider sex concordant and discordant dyads

**Table S2.** Distribution of PNA by select pharmacological subgroups classes

**Table S3.** Distribution of Primary non-adherence by number of prescriptions prescribed in the past 12 months for the overall study cohort.

## Appendices

**Appendix 1A.** Description of datasets

**Appendix 1B.** Covariance parameters test results and calculation of the conditional correlation coefficients of the hierarchical logistic regression model for the overall study cohort

**Figure S1.** Scheme illustrating the definition and characterization of primary non-adherence (PNA) in our study

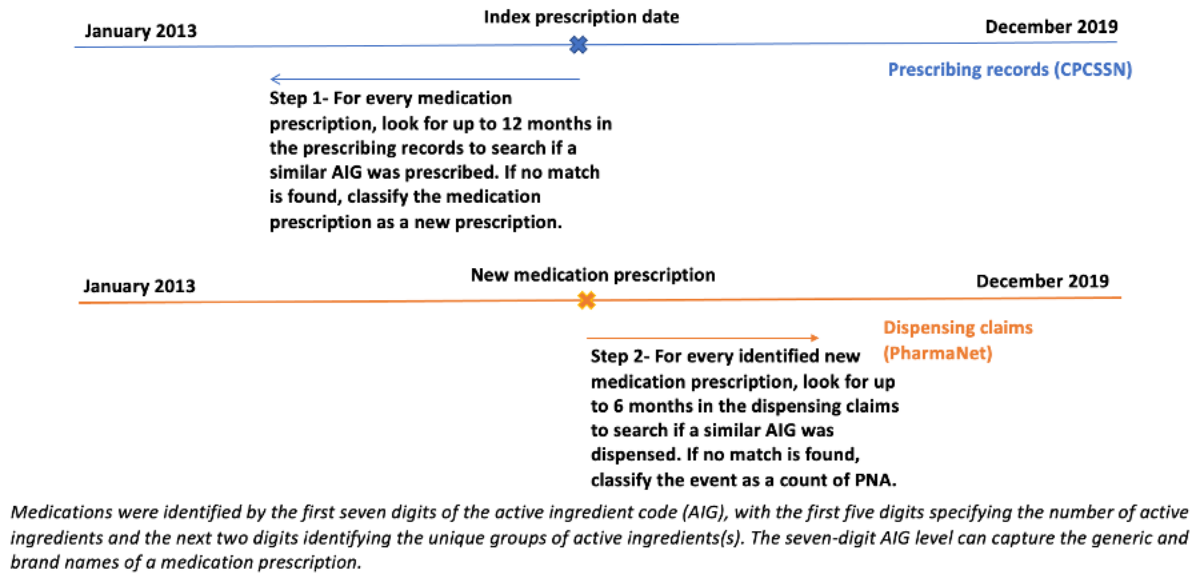

**Table S1. Two-by-two tables of PNA rates across patient-provider sex concordant and discordant dyads**

|                    | Primary care provider male      |                                         |             | Primary care provider female    |                                         |                  |
|--------------------|---------------------------------|-----------------------------------------|-------------|---------------------------------|-----------------------------------------|------------------|
|                    | Number of new prescriptions (%) | Number of unfilled prescriptions (PNA%) | p-value*    | Number of new prescriptions (%) | Number of unfilled prescriptions (PNA%) | p-value*         |
| <b>Patient sex</b> | <b>N=80,686</b>                 | <b>12,159 (15.1)</b>                    | <b>0.01</b> | <b>N= 69,879</b>                | <b>13,490(19.3)</b>                     | <b>&lt;0.001</b> |
| <b>female</b>      | 42,051(52.1)                    | 6,483(15.4)                             |             | 53,801(77.0)                    | 10,174(18.9)                            |                  |
| <b>male</b>        | 38,419(47.6)                    | 5,641(14.7)                             |             | 15,984(22.9)                    | 3,305(20.7)                             |                  |
| <b>unknown</b>     | 216(0.3)                        | 35(16.2)                                |             | 94(0.1)                         | 11(11.7)                                |                  |

\*Chi-square test for categorical variables

**Table S2. Distribution of PNA by select pharmacological subgroups**

| Pharmacological subgroups                                    | ATC 3rd level | Total number of new prescriptions N (%) | Number of new prescriptions unfilled | PNA (%) |
|--------------------------------------------------------------|---------------|-----------------------------------------|--------------------------------------|---------|
| <b>Drugs Used in Diabetes</b>                                | A10           | 2,756(1.8)                              | 379                                  | 13.8    |
| <b>Antihypertensives</b>                                     | C02           | 174(0.1)                                | 19                                   | 10.9    |
| <b>Diuretics</b>                                             | C03           | 3,329(2.1)                              | 304                                  | 9.4     |
| <b>Beta blocking agents</b>                                  | C07           | 2,217(1.5)                              | 149                                  | 6.7     |
| <b>Calcium channel blockers</b>                              | C08           | 2,019(1.3)                              | 146                                  | 7.2     |
| <b>ACE/ARBs</b>                                              | C09           | 5,726(3.8)                              | 489                                  | 8.5     |
| <b>Lipid modifying agents</b>                                | C10           | 4,636(3.1)                              | 320                                  | 6.9     |
| <b>Topical corticosteroids (dermatological preparations)</b> | D07           | 6,415(4.3)                              | 2,250                                | 35.1    |
| <b>Hormonal contraceptives</b>                               | G03           | 8,346(5.5)                              | 1,173                                | 14.1    |
| <b>Antibacterials</b>                                        | J01           | 16,895(11.2)                            | 3,239                                | 19.2    |
| <b>Antivirals</b>                                            | J05           | 2,600(1.7)                              | 418                                  | 16.1    |
| <b>Analgesics</b>                                            | N02           | 7,462(5.0)                              | 990                                  | 13.3    |
| <b>Antiepileptics</b>                                        | N03           | 2,683(1.8)                              | 285                                  | 10.6    |
| <b>Anti-Parkinson Drugs</b>                                  | N04           | 208(0.1)                                | 21                                   | 10.1    |
| <b>Psycholeptics</b>                                         | N05           | 6,501(4.3)                              | 685                                  | 10.5    |
| <b>Psychoanaleptics</b>                                      | N06           | 10,513(7.0)                             | 1,395                                | 13.3    |
| <b>Nasal preparations</b>                                    | R01           | 4,448(3.0)                              | 922                                  | 20.7    |
| <b>Cough and cold</b>                                        | R05           | 593 (0.4)                               | 119                                  | 20.1    |
| <b>Antihistamines</b>                                        | R06           | 994(0.7)                                | 233                                  | 23.4    |

**Table S3. Distribution of Primary non-adherence by number of prescriptions written in the past 12 months.**

| <b>Frequency of prescriptions written in the past 12 months</b> | <b>Number of new prescriptions written</b> | <b>Number of new prescriptions that were not filled (PNA)</b> |
|-----------------------------------------------------------------|--------------------------------------------|---------------------------------------------------------------|
| <b>0</b>                                                        | 62,715 (41.7)                              | 10,933 (17.4)                                                 |
| <b>1</b>                                                        | 21,334 (14.2)                              | 3,705 (17.4)                                                  |
| <b>2</b>                                                        | 14,106 (9.4)                               | 2,569 (18.2)                                                  |
| <b>3</b>                                                        | 9,520 (6.3)                                | 1,526 (16.0)                                                  |
| <b>4</b>                                                        | 7,185 (4.8)                                | 1,168 (16.3)                                                  |
| <b>5</b>                                                        | 5,123 (3.4)                                | 853 (16.7)                                                    |
| <b>6</b>                                                        | 4,393 (2.9)                                | 729 (16.6)                                                    |
| <b>7</b>                                                        | 3,302 (2.2)                                | 535 (16.2)                                                    |
| <b>8</b>                                                        | 2,894 (1.9)                                | 469 (16.2)                                                    |
| <b>9</b>                                                        | 2,378 (1.6)                                | 354 (14.9)                                                    |
| <b>10</b>                                                       | 1,953 (1.3)                                | 291 (14.9)                                                    |
| <b>&gt;=11</b>                                                  | 15,662 (10.4)                              | 2,517 (16.1)                                                  |
| <b>Total</b>                                                    | 150,565 (100.0)                            | 25,649 (17.0)                                                 |

## Appendix 1 A. Description of datasets

We used three linked administrative datasets from Population Data BC using unique encoded identifiers, including (a) electronic medical records (EMR) from the BC Canadian Primary Care Sentinel Surveillance Network (BC CPCSSN) database; (b) the BC PharmaNet prescription drug claims database; and (c) Medical Services Plan (MSP) consolidation files. We also used the Health Canada Drug Product Database (DPD) to retrieve medication information such as active ingredient (AIG) codes and the anatomical classification system (ATC). These datasets are further described below

- 1- The BC CPCSSN practice-based research contributes its de-identified data to Canada's largest national repository of primary care electronic medical records. (1) The architecture and approach of CPCSSN data extraction are described elsewhere. (2) CPCSSN data is used for surveillance and research and is considered moderately representative of the Canadian patient population, with slight skewness to older adults and female patients (3) (4). The prescribing data from the BC CPCSSN recorded all prescriptions issued by CPCSSN prescribers/providers (e.g., family physicians, and nurse practitioners), regardless of whether they were eventually filled. The data included information on providers' and patients' demographic characteristics, primary visit encounters, and medications (i.e., prescription date, drug name, drug identification number (DIN), dosage, form, and other variables).
- 2- The dispensing claims from PharmaNet included data on prescriptions that patients filled and, as such, constituted a subset of prescriptions written by CPCSSN providers. The PharmaNet claims included information about the patient, medication, drug cost, drug

coverage plan and prescription fill date. For both prescribing and dispensing claims datasets, we added fields for AIG codes that had been linked, by DIN, from the Health Canada Drug product database (5). Medications were identified by the first seven digits of the active ingredient code, which specify the number of active ingredients and the unique groups of active ingredients(s). (5) The first seven digits of the AIG would capture the generic and brand names of a medication prescription.

- 3- Finally, we used the MSP consolidation files to obtain patient sociodemographic characteristics such as age, biological sex, neighbourhood income quintile, and registration status with the provincial medical services plan.

**Appendix 1B. Covariance parameters test results and calculation of the conditional correlation coefficients of the hierarchical logistic regression model for the overall study cohort**

| Covariance parameter | Covariance parameter estimates |          |                |         |
|----------------------|--------------------------------|----------|----------------|---------|
|                      | Subject                        | Estimate | Standard error | p-value |
| <b>Intercept</b>     | Provider                       | 0.005    | 0.001          | 0.0002  |
| <b>Intercept</b>     | Patient(provider)              | 0.014    | 0.0005         | <.0001  |
| <b>Residual</b>      |                                | 0.128    | 0.0006         | <.0001  |

In *SAS Proc Glimmix*, the *COVTEST* statement generate hypothesis tests for the variance and covariance components in a hierarchical logistic regression model. The test of covariance parameter (*COVTEST*) indicated that both the prescriber-level random intercept ( $p=0.0002$ ) and the patient-level random intercept ( $p<0.0001$ ) were needed. The correlation between the responses in the same level-3 cluster, but different level-2 cluster is  $0.005 / (0.005+0.014+0.128) = 0.03$ . The correlation between the responses in the same level-2 cluster, but different level-1 cluster is  $(0.005+0.014) / (0.005+0.014+0.128) = 0.13$ . Of the total variability in PNA that is not observed by the covariates, 3% could be accounted for by unobserved prescriber-specific attributes, and 13% could be accounted for by unobserved patient-specific characteristics (6).

## References:

1. Canadian Primary Care Sentinel Surveillance Network. Canadian Primary Care Sentinel Surveillance Network (CPCSSN) [Internet]. Canadian Primary Care Sentinel Surveillance Network. 2022 [cited 2022 Jun 15]. Available from: <http://cpcssn.ca/>
2. Vijh R, Wong ST, Grandy M, Peterson S, Ezzat AM, Gibb AG, et al. Identifying heart failure in patients with chronic obstructive lung disease through the Canadian Primary Care Sentinel Surveillance Network in British Columbia: a case derivation study. *C open* [Internet]. 2021 Apr 1;9(2):E376–83. Available from: <https://pubmed.ncbi.nlm.nih.gov/33863795/>
3. John A. Queenan, Tyler Williamson, Shahriar Khan, Neil Drummond, Stephanie Garies, Rachael Morkem, et al. Representativeness of patients and providers in the Canadian Primary Care Sentinel Surveillance Network: a cross-sectional study. *C Open*. 2016;
4. Garies S, Birtwhistle R, Drummond N, Queenan J, Williamson T. Data Resource Profile: National electronic medical record data from the Canadian Primary Care Sentinel Surveillance Network (CPCSSN). *Int J Epidemiol*. 2017;46(4):1091-1092f.
5. Health Canada Drug Product Database [Internet]. [cited 2022 May 5]. Available from: <https://health-products.canada.ca/dpd-bdpp/index-eng.jsp>
6. Zhu M. Analyzing Multilevel Models with the GLIMMIX Procedure. *SAS Glob Forum* 2014. 2014;1–18.
